# Supplementary material for: Screening Ingredients from Herbs against Pregnane X Receptor in the Study of Inductive Herb-Drug Interactions: Combining Pharmacophore and Docking-Based Rank Aggregation
Source: Hindawi journal article supplement (doi:10.1155/2015/657159), 2015-01-01
Supplement: f1 [file 657159.f1.pdf]

## Supplementary Materials

**Table S1: Ranks for 107 agonists of PXR from EC<sub>50</sub>, docking and rank aggregation.**

107 compounds are labeled by monomer identifier in the Binding Database.

| Rank | EC <sub>50</sub> | ASE(A)   | Affinity<br>dG(B) | Alpha<br>HB(C) | London<br>dG(D) | AB       | AC       | AD       | BC       | BD       | CD       | ABC      | ABD      | ACD      | ABCD     |
|------|------------------|----------|-------------------|----------------|-----------------|----------|----------|----------|----------|----------|----------|----------|----------|----------|----------|
| 1    | 21670            | 50347619 | 50323533          | 50347619       | 50347619        | 50323533 | 50261050 | 75527    | 50333724 | 50333724 | 50333724 | 50347619 | 21670    | 50347619 | 50347619 |
| 2    | 50251088         | 50333723 | 50333724          | 50323530       | 50333724        | 50333724 | 50333711 | 50347619 | 50323530 | 50323533 | 50323530 | 50316513 | 50333724 | 50333724 | 50316513 |
| 3    | 50251070         | 50333716 | 50323530          | 50333724       | 50323533        | 21670    | 50333724 | 50323533 | 50323533 | 50347619 | 50323533 | 50333724 | 50261010 | 50333719 | 50333724 |
| 4    | 21673            | 50333711 | 21672             | 50323533       | 75527           | 50333722 | 50323530 | 50316513 | 50261010 | 50316513 | 50347619 | 50323530 | 21673    | 50333723 | 50323530 |
| 5    | 19993            | 50333724 | 50260967          | 21672          | 21670           | 50261050 | 50347619 | 50333723 | 50260967 | 50261010 | 50261050 | 50323533 | 50323530 | 50333716 | 50323533 |
| 6    | 50251092         | 50333713 | 21673             | 69532          | 21673           | 50347619 | 50316513 | 50333724 | 21672    | 75527    | 21672    | 50260911 | 50333713 | 50261010 | 50260911 |
| 7    | 21671            | 50333722 | 50260911          | 50260966       | 21666           | 50333719 | 50333713 | 21670    | 50260911 | 21673    | 21666    | 50261010 | 50347619 | 50333711 | 50261010 |
| 8    | 50251081         | 50333719 | 21671             | 21666          | 50181559        | 50316513 | 50333719 | 50261050 | 50340800 | 21672    | 69532    | 50260967 | 50260966 | 21670    | 50260967 |
| 9    | 50251048         | 50348294 | 50316513          | 50251088       | 50323530        | 21673    | 50323533 | 50333713 | 21673    | 21671    | 21671    | 50333713 | 50323533 | 21666    | 50333713 |
| 10   | 50251056         | 50261050 | 50261010          | 50340800       | 50251110        | 21671    | 50340800 | 50261008 | 50347619 | 50323530 | 19993    | 50251092 | 50333722 | 50261050 | 50251092 |
| 11   | 50251069         | 21670    | 50340798          | 50261050       | 50333723        | 50261010 | 50333723 | 50333719 | 50333719 | 21670    | 21673    | 50333711 | 50260911 | 50181559 | 50333711 |
| 12   | 50251089         | 50323533 | 21670             | 50333716       | 19993           | 50333716 | 50333716 | 50333711 | 50333716 | 21664    | 50251088 | 21666    | 50333716 | 21672    | 21666    |
| 13   | 50251068         | 50348308 | 50252940          | 21673          | 21672           | 50323530 | 21666    | 50333722 | 21671    | 50260967 | 75527    | 21671    | 50333719 | 50323530 | 21671    |
| 14   | 50251102         | 50323530 | 50260880          | 21664          | 21663           | 50251088 | 50261010 | 50260911 | 50181559 | 50340829 | 50252940 | 50251088 | 50316513 | 21673    | 50251088 |
| 15   | 50251090         | 50348296 | 50251067          | 50260911       | 50316513        | 21672    | 50348294 | 50260966 | 50251088 | 50340798 | 50181559 | 50261050 | 75527    | 75527    | 50261050 |

---

|    |          |          |          |          |          |          |          |          |          |          |          |          |          |          |          |
|----|----------|----------|----------|----------|----------|----------|----------|----------|----------|----------|----------|----------|----------|----------|----------|
| 16 | 50251091 | 50261010 | 50251110 | 50251067 | 75532    | 50333723 | 50251110 | 50333716 | 50251110 | 50260911 | 50260911 | 50348308 | 50260967 | 50333713 | 50348308 |
| 17 | 50251110 | 50316513 | 50333719 | 50261010 | 50261008 | 50260911 | 21665    | 50348296 | 50251057 | 50260966 | 50251110 | 50333716 | 50251092 | 50323533 | 50333716 |
| 18 | 50251099 | 50251092 | 50251079 | 50333711 | 21671    | 50261008 | 21670    | 50252940 | 50251109 | 50251088 | 50251050 | 50333722 | 50251088 | 50252940 | 50333722 |
| 19 | 21665    | 50260966 | 50261008 | 50251057 | 50252940 | 50260967 | 50260967 | 50340800 | 50261050 | 19993    | 50260967 | 50340800 | 50340820 | 50260966 | 50340800 |
| 20 | 50348293 | 50340800 | 19993    | 50251048 | 50261010 | 50333711 | 50251092 | 50251088 | 50251049 | 50251079 | 50261008 | 50251090 | 21671    | 50251088 | 50251090 |
| 21 | 50348292 | 50251090 | 50347619 | 50181559 | 21664    | 21666    | 75527    | 50251110 | 50261008 | 50261008 | 21665    | 21670    | 50252940 | 21665    | 21670    |
| 22 | 50348294 | 50260911 | 50260966 | 50251050 | 50261050 | 50251110 | 50251088 | 50323530 | 50260908 | 21666    | 50316513 | 50260966 | 50181559 | 21671    | 50260966 |
| 23 | 50348308 | 50348293 | 50251088 | 50260967 | 50340829 | 50348294 | 50261008 | 50348294 | 50260880 | 50261050 | 75488    | 50348294 | 50251067 | 50251070 | 50348294 |
| 24 | 50348291 | 75527    | 50333716 | 50316513 | 50260911 | 50251092 | 21671    | 50260910 | 50251050 | 50252940 | 21663    | 21673    | 50260880 | 50251110 | 21673    |
| 25 | 50348296 | 50348292 | 50333722 | 50333723 | 21665    | 50260797 | 50252940 | 21672    | 50251058 | 50181559 | 50251090 | 50340798 | 50251048 | 50251048 | 50340798 |
| 26 | 21666    | 50348291 | 50260797 | 21663    | 21668    | 50348308 | 50260910 | 50181559 | 50251078 | 21665    | 50251079 | 50251101 | 50348293 | 75532    | 50251101 |
| 27 | 50251050 | 50251110 | 75527    | 21671    | 21667    | 50348292 | 50251101 | 19993    | 50340820 | 50340794 | 50333723 | 50348293 | 50348294 | 50251090 | 50348293 |
| 28 | 50251059 | 50261008 | 50251102 | 50333719 | 50333719 | 50251067 | 50251079 | 50251102 | 50260938 | 21667    | 50260908 | 50181559 | 50340800 | 50261008 | 50181559 |
| 29 | 50251079 | 50251088 | 50348294 | 50251090 | 50251088 | 50251102 | 50260966 | 50251049 | 50333722 | 50333716 | 21670    | 50251050 | 50333723 | 50260908 | 50251050 |
| 30 | 50252940 | 21666    | 50260910 | 75532    | 50251050 | 50251069 | 75488    | 50260938 | 21664    | 50251049 | 50251092 | 50260908 | 50340829 | 50260911 | 50260908 |
| 31 | 50251100 | 50251089 | 21665    | 50251110 | 50333716 | 21665    | 50260911 | 50251091 | 50251090 | 50333722 | 50260966 | 50333719 | 21666    | 50348292 | 50333719 |
| 32 | 50251101 | 50260910 | 50340820 | 75488    | 50251048 | 50251109 | 50251048 | 21665    | 19993    | 21663    | 50251067 | 50251051 | 50333711 | 50260967 | 50251051 |
| 33 | 50251058 | 50260967 | 50251089 | 50251092 | 50340802 | 50260910 | 50251051 | 21666    | 50340798 | 50348296 | 50333711 | 50251079 | 50261050 | 50316513 | 50251079 |
| 34 | 50251057 | 50260880 | 50340800 | 50348294 | 50251070 | 50260908 | 50251049 | 50261010 | 50316513 | 50251089 | 21664    | 50252940 | 50348308 | 50251089 | 50252940 |
| 35 | 50251109 | 50251051 | 50251092 | 50333713 | 50340794 | 19993    | 50251109 | 50251070 | 50260910 | 50333713 | 50251102 | 50333723 | 50251089 | 21663    | 50333723 |
| 36 | 50251067 | 50260936 | 50251049 | 75527    | 50260967 | 50348293 | 50181559 | 21673    | 50333723 | 50251110 | 21668    | 21663    | 50340794 | 50340802 | 21663    |
| 37 | 50251051 | 50260797 | 50333713 | 50251079 | 50251092 | 50333713 | 50251057 | 75488    | 50251048 | 50251100 | 50260910 | 21672    | 50251068 | 75450    | 21672    |
| 38 | 21664    | 50251070 | 50348308 | 50252940 | 50251067 | 50251051 | 21663    | 21671    | 75532    | 50348294 | 50340800 | 50251048 | 21663    | 50251092 | 50251048 |
| 39 | 50251078 | 50251091 | 50251050 | 50251101 | 50260966 | 50181559 | 21672    | 50251090 | 50251067 | 50251056 | 50251101 | 21665    | 21664    | 50348294 | 21665    |
| 40 | 50333711 | 50251049 | 50261050 | 50251109 | 50333711 | 50340798 | 50251067 | 50260936 | 21666    | 50260880 | 32292    | 50251049 | 50251070 | 50251078 | 50251049 |
| 41 | 50333713 | 50251079 | 50251059 | 50260938 | 50251079 | 50260880 | 50348308 | 75532    | 50348294 | 50251050 | 50251051 | 50251081 | 50340798 | 50251099 | 50251081 |

---

---

|    |          |          |          |          |          |          |          |          |          |          |          |          |          |          |          |
|----|----------|----------|----------|----------|----------|----------|----------|----------|----------|----------|----------|----------|----------|----------|----------|
| 42 | 50261010 | 50340820 | 50340794 | 50261008 | 50333713 | 50340794 | 50260797 | 50348308 | 50333711 | 50260797 | 75532    | 21664    | 50261008 | 21668    | 21664    |
| 43 | 50333716 | 50181559 | 50181559 | 19993    | 50251102 | 50340829 | 21664    | 50340794 | 50260966 | 50251048 | 50261010 | 50260880 | 50251060 | 21664    | 50260880 |
| 44 | 50251049 | 50340802 | 50251109 | 21670    | 50251109 | 50251090 | 75450    | 50251079 | 21670    | 50260938 | 50260936 | 19993    | 50251079 | 50340820 | 19993    |
| 45 | 50333719 | 50340798 | 50251051 | 50251060 | 50260908 | 50251091 | 50251050 | 50251067 | 21663    | 50251070 | 50333716 | 50251089 | 50251109 | 50333722 | 50251089 |
| 46 | 21672    | 21671    | 50340829 | 50251078 | 50348294 | 50260938 | 75532    | 21664    | 50333713 | 50251057 | 50251109 | 50261008 | 50260938 | 50340800 | 50261008 |
| 47 | 21663    | 21673    | 50251100 | 50260910 | 50251099 | 50340820 | 75525    | 50251092 | 50348296 | 75475    | 50251089 | 75488    | 50348291 | 50251102 | 75488    |
| 48 | 50260966 | 50260908 | 21666    | 50251049 | 50251057 | 50251100 | 50348296 | 50340829 | 50251092 | 50340820 | 50251059 | 50251067 | 50348296 | 50251051 | 50251067 |
| 49 | 50251060 | 50252940 | 50251090 | 50251058 | 75505    | 21668    | 50333722 | 50251051 | 75527    | 50251059 | 50251069 | 69532    | 50251100 | 50260797 | 69532    |
| 50 | 50239407 | 50251067 | 50251048 | 50333722 | 50251100 | 50252940 | 50251059 | 50260797 | 50251100 | 50251051 | 75505    | 50251057 | 50251069 | 71633    | 50251057 |
| 51 | 50260880 | 21665    | 50251070 | 21665    | 50251068 | 50251079 | 50251090 | 21663    | 50348293 | 50333719 | 50251048 | 50260797 | 50251059 | 50251057 | 50260797 |
| 52 | 50260911 | 50260938 | 21664    | 21668    | 50251090 | 50251089 | 50260938 | 50260880 | 50340829 | 50348308 | 50340829 | 21667    | 75475    | 50251059 | 21667    |
| 53 | 50260797 | 50251048 | 50251078 | 50260908 | 50260880 | 50251050 | 75505    | 50251109 | 50251102 | 50348293 | 50333719 | 50251058 | 50251090 | 69532    | 50251058 |
| 54 | 50333722 | 50251057 | 50348296 | 50251051 | 50251049 | 50260966 | 50317579 | 75469    | 32292    | 50333723 | 75517    | 50260910 | 19993    | 50251109 | 50260910 |
| 55 | 50260936 | 50340794 | 50260938 | 50251059 | 50317579 | 50251070 | 50251102 | 75525    | 50251060 | 50251102 | 50260797 | 50348296 | 50348292 | 19993    | 50348296 |
| 56 | 50340798 | 50251069 | 21663    | 75475    | 75488    | 21669    | 50251070 | 50251056 | 21667    | 50251090 | 50251091 | 50251110 | 50340802 | 75525    | 50251110 |
| 57 | 50260967 | 75532    | 50251101 | 50260936 | 75481    | 50251059 | 21668    | 50260908 | 50251081 | 50260936 | 50251057 | 50251069 | 21672    | 50251091 | 50251069 |
| 58 | 50317579 | 75488    | 50251069 | 50340820 | 75475    | 50251048 | 50340820 | 50251050 | 75479    | 50251078 | 50340798 | 75475    | 50251051 | 50251101 | 75475    |
| 59 | 50260908 | 50251068 | 50251057 | 50251081 | 50333722 | 50348296 | 21673    | 50251068 | 48711    | 50251109 | 50348294 | 50251078 | 50251057 | 50251081 | 50251078 |
| 60 | 50340800 | 50251102 | 50333723 | 75505    | 50260910 | 50251060 | 50340829 | 50251048 | 50251079 | 50251091 | 50251049 | 50340820 | 50260797 | 50251060 | 50340820 |
| 61 | 50340802 | 75525    | 50260908 | 50251089 | 50251051 | 50348291 | 50340798 | 50251081 | 50251089 | 50260908 | 21667    | 50251100 | 50251110 | 50251056 | 50251100 |
| 62 | 50316513 | 50251059 | 50348293 | 50340829 | 50260938 | 50251057 | 50251056 | 50348292 | 50251059 | 50251060 | 75491    | 50340802 | 50251102 | 50260910 | 50340802 |
| 63 | 50347619 | 21672    | 50317579 | 50340802 | 21669    | 75525    | 50251078 | 50348291 | 50348291 | 75491    | 50340820 | 75527    | 75532    | 75488    | 75527    |
| 64 | 50181559 | 75450    | 50348291 | 50260880 | 50348296 | 50251058 | 50348292 | 75481    | 50260797 | 50251099 | 50260938 | 75532    | 50260910 | 50251079 | 75532    |
| 65 | 50333723 | 50251109 | 75479    | 50251102 | 69532    | 75532    | 50251100 | 21668    | 50251068 | 50340800 | 50251078 | 48711    | 50260936 | 50340798 | 48711    |
| 66 | 50260910 | 50251056 | 32292    | 50251100 | 50260936 | 50251101 | 75475    | 75475    | 50251101 | 75488    | 50333722 | 50251070 | 50317579 | 50251050 | 50251070 |
| 67 | 50261008 | 19993    | 50333711 | 21667    | 50251091 | 75488    | 50260880 | 75486    | 75488    | 50251068 | 75481    | 50340794 | 32292    | 50260938 | 50340794 |

---

---

|    |          |          |          |          |          |          |          |          |          |          |          |          |          |          |          |
|----|----------|----------|----------|----------|----------|----------|----------|----------|----------|----------|----------|----------|----------|----------|----------|
| 68 | 50340794 | 50239407 | 75488    | 32292    | 32292    | 75491    | 50260908 | 50348293 | 50348308 | 75479    | 50251068 | 75517    | 50251081 | 50251067 | 75517    |
| 69 | 21669    | 71633    | 50348292 | 50251099 | 50340800 | 75527    | 50260936 | 50340802 | 75475    | 21669    | 50333713 | 50348292 | 50251058 | 75491    | 50348292 |
| 70 | 21668    | 50251081 | 50251060 | 48711    | 50260797 | 50251049 | 50251089 | 75491    | 50348292 | 50251067 | 50251100 | 75450    | 50260908 | 50348308 | 75450    |
| 71 | 21667    | 21664    | 75475    | 75479    | 50340820 | 50317579 | 50251069 | 50260967 | 50251056 | 50340802 | 71633    | 50251060 | 75488    | 21667    | 50251060 |
| 72 | 50333724 | 50251101 | 75532    | 50251070 | 50251089 | 50340800 | 75486    | 21667    | 21665    | 50251069 | 50251081 | 50260936 | 50251050 | 50260880 | 50260936 |
| 73 | 50260938 | 75469    | 50251056 | 75481    | 50340798 | 50260936 | 50251081 | 50340798 | 69532    | 50333711 | 50251058 | 75449    | 48711    | 32292    | 75449    |
| 74 | 75488    | 75459    | 50251058 | 50251056 | 50251078 | 75459    | 19993    | 50239407 | 50252940 | 75505    | 50251056 | 50251056 | 71633    | 50260936 | 50251056 |
| 75 | 69532    | 50251050 | 50340802 | 75459    | 50251101 | 75475    | 75459    | 50251100 | 50251070 | 50260910 | 75475    | 50251068 | 50251091 | 50251069 | 50251068 |
| 76 | 50340829 | 50340829 | 50251099 | 50348293 | 50251056 | 75479    | 50251060 | 50251059 | 50251099 | 75477    | 50260880 | 50251059 | 75450    | 50340794 | 50251059 |
| 77 | 50340820 | 50251058 | 50251091 | 75486    | 50251069 | 50251068 | 48711    | 50251099 | 50317579 | 48711    | 50251070 | 75469    | 75449    | 50251100 | 75469    |
| 78 | 50261050 | 50251099 | 50251068 | 50260797 | 75477    | 50239407 | 50340802 | 50251089 | 50251091 | 50251081 | 50317579 | 50251102 | 21665    | 50340829 | 50251102 |
| 79 | 75450    | 75491    | 75491    | 50348296 | 50251059 | 21664    | 71633    | 69532    | 21668    | 21668    | 21669    | 50251109 | 50251049 | 50348296 | 50251109 |
| 80 | 75491    | 75475    | 50251081 | 50340798 | 75491    | 50251056 | 75469    | 50251058 | 71633    | 50348292 | 75486    | 50260938 | 75492    | 75517    | 50260938 |
| 81 | 75525    | 50251060 | 21667    | 50251069 | 50251081 | 50251099 | 50251091 | 50251057 | 50251051 | 75492    | 50348291 | 75479    | 75479    | 50348293 | 75479    |
| 82 | 75517    | 50251078 | 21668    | 50348308 | 50251060 | 21663    | 50348293 | 75517    | 50251069 | 50251101 | 50340794 | 50348291 | 50251101 | 50348291 | 50348291 |
| 83 | 75534    | 50251100 | 75487    | 75510    | 71633    | 75469    | 50348291 | 50317579 | 75481    | 50251058 | 50340802 | 21668    | 75505    | 50251049 | 21668    |
| 84 | 48711    | 50317579 | 50260936 | 50251068 | 75486    | 75450    | 75492    | 50251101 | 75492    | 32292    | 50348308 | 50340829 | 50251078 | 50239407 | 50340829 |
| 85 | 75510    | 75481    | 75469    | 75450    | 75487    | 50251078 | 69532    | 75449    | 50340794 | 75532    | 50251060 | 21669    | 75459    | 21669    | 21669    |
| 86 | 75492    | 21668    | 21669    | 21669    | 75479    | 75505    | 50251068 | 50340820 | 21669    | 50251092 | 50348293 | 32292    | 50251056 | 50251068 | 32292    |
| 87 | 75481    | 21663    | 48711    | 50348292 | 50348291 | 75486    | 50251058 | 75505    | 75491    | 71633    | 75477    | 50239407 | 50251099 | 75479    | 50239407 |
| 88 | 75479    | 75447    | 71633    | 50251091 | 50348308 | 50340802 | 21669    | 50251060 | 50239407 | 75447    | 48711    | 75481    | 21667    | 75505    | 75481    |
| 89 | 71633    | 48711    | 75520    | 75517    | 75449    | 48711    | 75481    | 50251069 | 50260936 | 75481    | 75487    | 75525    | 50239407 | 75481    | 75525    |
| 90 | 75520    | 75479    | 50239407 | 50348291 | 48711    | 75447    | 50340794 | 50251078 | 75505    | 50239407 | 75450    | 50251099 | 75491    | 50251058 | 50251099 |
| 91 | 50264073 | 21669    | 75450    | 75525    | 75492    | 50251081 | 75447    | 71633    | 75486    | 75459    | 75525    | 71633    | 75469    | 48711    | 71633    |
| 92 | 69214    | 75505    | 75492    | 75491    | 50239407 | 32292    | 32292    | 75447    | 75487    | 75450    | 50348296 | 75459    | 75481    | 50317579 | 75459    |
| 93 | 75532    | 75449    | 75505    | 75476    | 75447    | 75487    | 75479    | 75450    | 50340802 | 50348291 | 75479    | 50251091 | 69532    | 75486    | 50251091 |

---

---

|     |          |          |          |          |          |          |          |          |          |          |          |          |          |          |          |
|-----|----------|----------|----------|----------|----------|----------|----------|----------|----------|----------|----------|----------|----------|----------|----------|
| 94  | 75486    | 75517    | 69532    | 75492    | 50348292 | 69214    | 50239407 | 75459    | 75477    | 50317579 | 50348292 | 50317579 | 21669    | 75475    | 50317579 |
| 95  | 75469    | 32292    | 75525    | 75447    | 50251058 | 50264073 | 50251099 | 69214    | 75525    | 75449    | 50251099 | 75492    | 21668    | 75447    | 75492    |
| 96  | 75449    | 75486    | 75449    | 75477    | 75450    | 71633    | 75534    | 75492    | 50264073 | 69532    | 75447    | 75491    | 75525    | 75510    | 75491    |
| 97  | 75477    | 21667    | 75459    | 75449    | 75517    | 75520    | 75517    | 32292    | 75520    | 75487    | 75459    | 75520    | 75447    | 75459    | 75520    |
| 98  | 75459    | 50264073 | 75486    | 50317579 | 50348293 | 75481    | 75491    | 75479    | 75469    | 69214    | 75510    | 75505    | 75486    | 75492    | 75505    |
| 99  | 32292    | 69532    | 50264073 | 71633    | 75510    | 21667    | 75449    | 21669    | 75459    | 75525    | 69214    | 75510    | 75520    | 75449    | 75510    |
| 100 | 75527    | 75487    | 75477    | 50340794 | 69214    | 69532    | 50264073 | 75477    | 75450    | 75486    | 75534    | 69214    | 75487    | 75476    | 69214    |
| 101 | 75476    | 75492    | 75481    | 50239407 | 75469    | 75492    | 21667    | 48711    | 75517    | 75517    | 75449    | 75487    | 50264073 | 75487    | 75487    |
| 102 | 75475    | 75520    | 75517    | 75469    | 75525    | 75510    | 75476    | 75487    | 75510    | 75469    | 75492    | 75486    | 75517    | 75520    | 75486    |
| 103 | 75505    | 75477    | 69214    | 75534    | 75459    | 75517    | 75510    | 75534    | 75534    | 75520    | 75476    | 75447    | 75510    | 75469    | 75447    |
| 104 | 75487    | 69214    | 75447    | 69214    | 75476    | 75449    | 75477    | 75520    | 75449    | 50264073 | 50239407 | 75477    | 75477    | 75477    | 75477    |
| 105 | 75447    | 75476    | 75510    | 75487    | 75534    | 75477    | 75520    | 75510    | 75476    | 75476    | 75520    | 50264073 | 69214    | 75534    | 50264073 |
| 106 | 50323530 | 75510    | 75534    | 50264073 | 50264073 | 75534    | 75487    | 50264073 | 75447    | 75510    | 75469    | 75476    | 75476    | 69214    | 75476    |
| 107 | 50323533 | 75534    | 75476    | 75520    | 75520    | 75476    | 69214    | 75476    | 69214    | 75534    | 50264073 | 75534    | 75534    | 50264073 | 75534    |

---

**Table S2: Ranks for 305 herbal ingredients predicted as candidate agonist of PXR from docking and rank aggregation.**

305 ingredients are labeled by PubChem Compound Identifier.

The final rank is obtained by aggregating three ranking lists (ASE, Affinity dG, Alpha HB).

| Rank | ASE (A)  | Affinity dG (B) | Alpha HB (C) | London dG (D) | Final    |
|------|----------|-----------------|--------------|---------------|----------|
| 1    | 432524   | 6477652         | 54605677     | 432524        | 3083427  |
| 2    | 3083427  | 6441188         | 108062       | 108062        | 10621    |
| 3    | 108062   | 6433489         | 6441188      | 5281233       | 161940   |
| 4    | 6433489  | 54605677        | 5199         | 3083427       | 432116   |
| 5    | 197563   | 5281233         | 161940       | 250395        | 6477652  |
| 6    | 54605677 | 108062          | 197561       | 161940        | 262500   |
| 7    | 262500   | 125210          | 432524       | 6433489       | 200662   |
| 8    | 197561   | 6441498         | 3083427      | 197561        | 197563   |
| 9    | 6477652  | 5199            | 44257279     | 441877        | 193876   |
| 10   | 18772499 | 161940          | 6433489      | 54605677      | 12314445 |
| 11   | 197977   | 275182          | 24847857     | 44257279      | 6433489  |
| 12   | 432116   | 115149          | 250395       | 197977        | 119245   |
| 13   | 11953919 | 12314445        | 5320686      | 5199          | 432524   |
| 14   | 24847857 | 86821           | 168849       | 197563        | 108062   |
| 15   | 119245   | 432116          | 197977       | 6441188       | 197561   |
| 16   | 125210   | 5271805         | 5280805      | 432116        | 5315459  |
| 17   | 128327   | 5320686         | 6475724      | 6477652       | 44257279 |
| 18   | 441877   | 200662          | 5271805      | 3084742       | 5281233  |
| 19   | 276547   | 16061280        | 432116       | 6441498       | 6441498  |
| 20   | 161940   | 5351212         | 16211077     | 24847857      | 5280746  |
| 21   | 441298   | 11953919        | 5281800      | 11953919      | 6441188  |

---

|    |          |          |          |          |          |
|----|----------|----------|----------|----------|----------|
| 22 | 200662   | 10621    | 10621    | 5315459  | 11953919 |
| 23 | 12314445 | 5281600  | 193876   | 3082301  | 441381   |
| 24 | 5199     | 276547   | 156073   | 10621    | 5199     |
| 25 | 5281233  | 5315459  | 441381   | 119245   | 5271805  |
| 26 | 86821    | 5281793  | 6441498  | 5281793  | 180948   |
| 27 | 275182   | 441298   | 174157   | 125210   | 125210   |
| 28 | 161388   | 5281613  | 5280746  | 5281751  | 24847857 |
| 29 | 94475    | 44257675 | 5315459  | 156073   | 480768   |
| 30 | 168849   | 54611038 | 115149   | 5281613  | 49775362 |
| 31 | 5351212  | 442664   | 442664   | 5280805  | 275182   |
| 32 | 2116     | 156073   | 5281613  | 262500   | 5281613  |
| 33 | 44257279 | 441381   | 44257675 | 5281600  | 5281051  |
| 34 | 442195   | 2116     | 3082301  | 442664   | 174157   |
| 35 | 14986    | 5281051  | 441877   | 44257675 | 17473    |
| 36 | 462196   | 6453770  | 6477652  | 193876   | 435402   |
| 37 | 65033    | 9954815  | 262500   | 54676854 | 441877   |
| 38 | 10621    | 180948   | 5281600  | 5281800  | 462196   |
| 39 | 115149   | 5281751  | 185617   | 5281051  | 155256   |
| 40 | 3082301  | 432524   | 17473    | 107905   | 5281800  |
| 41 | 5281800  | 128327   | 5281807  | 5320686  | 54605677 |
| 42 | 10219    | 5318893  | 64982    | 49775362 | 5281852  |
| 43 | 5280805  | 14986    | 5320844  | 65064    | 381851   |
| 44 | 6441188  | 94475    | 5281542  | 462196   | 22524411 |
| 45 | 442217   | 5318891  | 462196   | 168849   | 44259516 |
| 46 | 5281613  | 6475724  | 197563   | 5281777  | 5351212  |
| 47 | 442664   | 10389806 | 119245   | 5271805  | 72301    |

---

---

|    |          |          |          |          |          |
|----|----------|----------|----------|----------|----------|
| 48 | 49775362 | 5317419  | 10389806 | 16211077 | 442195   |
| 49 | 5281542  | 3083427  | 275182   | 441764   | 31553    |
| 50 | 5462438  | 65033    | 54676854 | 5280459  | 5318891  |
| 51 | 180948   | 441764   | 5280633  | 3033957  | 197977   |
| 52 | 435402   | 250395   | 6453770  | 5281675  | 5280805  |
| 53 | 5320686  | 11982640 | 3033957  | 5280746  | 54611038 |
| 54 | 193876   | 5318880  | 5280804  | 180948   | 5281542  |
| 55 | 156073   | 3081405  | 5281793  | 128327   | 6442181  |
| 56 | 5318880  | 10219    | 162350   | 5281673  | 46173967 |
| 57 | 441381   | 5281542  | 5280459  | 17473    | 11982640 |
| 58 | 44563198 | 193876   | 16211710 | 185617   | 5462438  |
| 59 | 65071    | 442217   | 5318891  | 174157   | 442664   |
| 60 | 5318893  | 10455036 | 180948   | 5351212  | 12305761 |
| 61 | 68051    | 5281800  | 5281751  | 65084    | 5280804  |
| 62 | 5318891  | 435402   | 5351212  | 44257224 | 5318880  |
| 63 | 5280746  | 44563159 | 441764   | 5281643  | 107905   |
| 64 | 54611038 | 462196   | 5383409  | 5280804  | 5281807  |
| 65 | 44257675 | 5462438  | 6037     | 5281603  | 23915    |
| 66 | 16061280 | 16211710 | 5281777  | 44259516 | 5281751  |
| 67 | 9954815  | 44563198 | 5281233  | 5281792  | 5281600  |
| 68 | 5839585  | 441663   | 22524411 | 5481237  | 276547   |
| 69 | 6442181  | 5280805  | 5281643  | 10389806 | 5320844  |
| 70 | 13872451 | 442195   | 503737   | 115149   | 168849   |
| 71 | 6441404  | 65071    | 44257224 | 49770697 | 16211710 |
| 72 | 196699   | 5481237  | 5281673  | 5281807  | 168114   |
| 73 | 155256   | 44257279 | 164146   | 31553    | 6475724  |

---



---

|    |          |          |          |          |          |
|----|----------|----------|----------|----------|----------|
| 74 | 5281753  | 31553    | 49775362 | 22524411 | 10219    |
| 75 | 6475724  | 5282102  | 25202038 | 3085830  | 5318893  |
| 76 | 72625    | 381851   | 22524410 | 441381   | 5281753  |
| 77 | 44257224 | 161388   | 52940094 | 5282102  | 117440   |
| 78 | 358902   | 13872451 | 5318880  | 5320844  | 44563198 |
| 79 | 6441405  | 9979767  | 12305761 | 5490064  | 10455036 |
| 80 | 11982640 | 168849   | 117440   | 64982    | 5481237  |
| 81 | 381851   | 181796   | 46173850 | 44260098 | 34059    |
| 82 | 5281852  | 44259516 | 5480505  | 5281542  | 1548943  |
| 83 | 5281754  | 49775362 | 94475    | 16211710 | 181796   |
| 84 | 6453770  | 5280933  | 107905   | 5318891  | 115149   |
| 85 | 23915    | 5383409  | 44258916 | 5318880  | 64982    |
| 86 | 54600668 | 44563121 | 5464155  | 5281775  | 441764   |
| 87 | 73114    | 65064    | 5317419  | 5280633  | 73466    |
| 88 | 168115   | 5281377  | 44259516 | 6475724  | 5280441  |
| 89 | 5271805  | 24847857 | 5481237  | 6453770  | 6419993  |
| 90 | 44259516 | 68051    | 161388   | 5383409  | 493570   |
| 91 | 99091    | 441877   | 5490064  | 5480505  | 168115   |
| 92 | 3084742  | 480768   | 5489486  | 162350   | 94475    |
| 93 | 443421   | 969516   | 31553    | 5281377  | 65064    |
| 94 | 5315459  | 5280746  | 5281051  | 189065   | 3082301  |
| 95 | 10455036 | 168115   | 9954815  | 114776   | 16211077 |
| 96 | 44563159 | 197561   | 114776   | 25202038 | 9954815  |
| 97 | 5281777  | 442647   | 276547   | 5281654  | 503737   |
| 98 | 3033957  | 185617   | 49770697 | 275182   | 261859   |
| 99 | 261859   | 114776   | 10219    | 42607998 | 44563159 |

---

---

|     |          |          |          |          |          |
|-----|----------|----------|----------|----------|----------|
| 100 | 6758     | 493570   | 12314445 | 11982640 | 73467    |
| 101 | 356660   | 3033957  | 441663   | 276547   | 128327   |
| 102 | 9979767  | 54600668 | 44563159 | 94475    | 6453770  |
| 103 | 5281125  | 44257224 | 5318893  | 10219    | 5320686  |
| 104 | 22524411 | 6442181  | 5281377  | 12305761 | 98369    |
| 105 | 6167     | 5281852  | 5282102  | 44258916 | 250395   |
| 106 | 44257399 | 44260098 | 442195   | 11948668 | 5317419  |
| 107 | 31553    | 5281777  | 5281675  | 5280441  | 442101   |
| 108 | 181796   | 503737   | 5281792  | 200662   | 5281673  |
| 109 | 44563121 | 5280804  | 9979767  | 181796   | 44258916 |
| 110 | 16211710 | 5281867  | 73466    | 480768   | 442435   |
| 111 | 174157   | 5280450  | 12315119 | 164146   | 196699   |
| 112 | 5480505  | 42607998 | 42608131 | 442662   | 5315263  |
| 113 | 6438142  | 5281792  | 5462438  | 72277    | 358902   |
| 114 | 168114   | 46173967 | 92735    | 44563198 | 443421   |
| 115 | 17473    | 92885    | 42607998 | 162464   | 5281867  |
| 116 | 46173966 | 92735    | 5281417  | 12314445 | 189065   |
| 117 | 643684   | 5281807  | 5839585  | 5317419  | 22524410 |
| 118 | 46173967 | 643684   | 65064    | 22524410 | 356660   |
| 119 | 72616    | 5281775  | 128327   | 65071    | 3085830  |
| 120 | 480768   | 5281406  | 5280441  | 16061280 | 5281794  |
| 121 | 441663   | 72625    | 3085830  | 5464461  | 72277    |
| 122 | 3085830  | 44135670 | 443354   | 10455036 | 366269   |
| 123 | 163776   | 5281643  | 107971   | 435402   | 49770696 |
| 124 | 117440   | 5280459  | 261859   | 54600668 | 25202038 |
| 125 | 445639   | 107971   | 44563198 | 5322079  | 65033    |

---

---

|     |          |          |          |          |          |
|-----|----------|----------|----------|----------|----------|
| 126 | 52940094 | 5280441  | 93045    | 73467    | 5383409  |
| 127 | 12315119 | 155256   | 442217   | 381851   | 5318998  |
| 128 | 46173965 | 22524411 | 200662   | 107848   | 12315119 |
| 129 | 72301    | 3082301  | 11948668 | 73466    | 54600668 |
| 130 | 10389806 | 107905   | 13872451 | 513197   | 86821    |
| 131 | 1309     | 16211077 | 10455036 | 5464155  | 5281775  |
| 132 | 34059    | 11005    | 5322079  | 5281608  | 5281777  |
| 133 | 6441498  | 34059    | 441298   | 13872451 | 440936   |
| 134 | 5281807  | 445639   | 381851   | 6037     | 9276     |
| 135 | 5481237  | 12305761 | 125210   | 443354   | 65071    |
| 136 | 92885    | 22524410 | 11982640 | 44563159 | 44257224 |
| 137 | 5281793  | 363452   | 5320351  | 107971   | 164146   |
| 138 | 5281752  | 3446460  | 99091    | 12309507 | 5282102  |
| 139 | 5318998  | 6442675  | 969516   | 42608131 | 5464461  |
| 140 | 164146   | 5281614  | 65033    | 392443   | 441298   |
| 141 | 6419993  | 49770697 | 44563121 | 34059    | 445070   |
| 142 | 5282102  | 5281125  | 1309     | 599030   | 5281793  |
| 143 | 442643   | 513197   | 5281603  | 3081405  | 5489486  |
| 144 | 5320351  | 22179    | 5464461  | 93045    | 3033957  |
| 145 | 54676854 | 358902   | 10154    | 261859   | 68051    |
| 146 | 44260098 | 16573    | 88708    | 46173850 | 5281417  |
| 147 | 5280450  | 64982    | 435402   | 441298   | 11948668 |
| 148 | 441764   | 25202038 | 442435   | 442514   | 668081   |
| 149 | 22524410 | 167718   | 366269   | 99091    | 5490064  |
| 150 | 42607998 | 5464155  | 34059    | 12315119 | 44563121 |
| 151 | 1548943  | 5281675  | 11953919 | 168114   | 37834    |

---

---

|     |          |          |          |          |          |
|-----|----------|----------|----------|----------|----------|
| 152 | 503737   | 11442    | 392443   | 9954815  | 72616    |
| 153 | 5280804  | 42608131 | 440936   | 44563121 | 442810   |
| 154 | 5281600  | 442810   | 181796   | 161388   | 91520    |
| 155 | 64982    | 68081    | 442101   | 2116     | 443322   |
| 156 | 167718   | 10154    | 107848   | 442195   | 2116     |
| 157 | 24197663 | 73114    | 12309507 | 5320462  | 513197   |
| 158 | 609998   | 174157   | 44260098 | 54611038 | 5464155  |
| 159 | 158940   | 46173966 | 5281608  | 5318893  | 442662   |
| 160 | 73467    | 6758     | 68051    | 5280666  | 11005    |
| 161 | 44258916 | 5322079  | 65084    | 441663   | 162350   |
| 162 | 185605   | 5281673  | 5280699  | 100058   | 9979767  |
| 163 | 11442    | 46173965 | 5281406  | 442435   | 46173966 |
| 164 | 185617   | 5490064  | 100058   | 5280699  | 443354   |
| 165 | 3081405  | 5280633  | 158940   | 49770696 | 44257675 |
| 166 | 5281751  | 5318624  | 2116     | 442101   | 158940   |
| 167 | 250395   | 443421   | 54611038 | 5315263  | 46173850 |
| 168 | 3661     | 443322   | 5315263  | 503737   | 98570    |
| 169 | 12305761 | 5280699  | 6850754  | 65033    | 5322079  |
| 170 | 5280933  | 117440   | 161036   | 358902   | 5281377  |
| 171 | 5281794  | 168114   | 14986    | 117440   | 107971   |
| 172 | 162350   | 6441405  | 54600668 | 9979767  | 5280933  |
| 173 | 3082205  | 10233    | 6441405  | 5281406  | 161388   |
| 174 | 5320844  | 1309     | 442647   | 356660   | 445639   |
| 175 | 5383409  | 163776   | 73467    | 37834    | 5280699  |
| 176 | 5281643  | 5281753  | 480768   | 14986    | 442514   |
| 177 | 5281673  | 5318998  | 163776   | 6441405  | 100058   |

---

---

|     |          |          |          |          |          |
|-----|----------|----------|----------|----------|----------|
| 178 | 162464   | 158940   | 5280666  | 158940   | 5280450  |
| 179 | 42608131 | 44258916 | 72625    | 98369    | 5280459  |
| 180 | 443322   | 37834    | 73160    | 443322   | 5280633  |
| 181 | 442435   | 6419993  | 23915    | 91520    | 46173965 |
| 182 | 5490064  | 54676854 | 167718   | 5281417  | 363452   |
| 183 | 366269   | 442435   | 72616    | 5318624  | 442217   |
| 184 | 442647   | 162350   | 493570   | 440936   | 6758     |
| 185 | 100058   | 442514   | 46173967 | 493570   | 10389806 |
| 186 | 25202038 | 5281754  | 91520    | 282014   | 6441404  |
| 187 | 5281131  | 164146   | 185605   | 52940094 | 73114    |
| 188 | 108053   | 99091    | 5281654  | 5281867  | 72625    |
| 189 | 11005    | 107848   | 5318624  | 5489486  | 42607998 |
| 190 | 107971   | 366269   | 65071    | 5281754  | 6850754  |
| 191 | 442793   | 196699   | 599030   | 23915    | 162464   |
| 192 | 443354   | 3084742  | 358902   | 442217   | 5839585  |
| 193 | 11948668 | 98369    | 189065   | 73160    | 599030   |
| 194 | 6857681  | 5646     | 442810   | 161871   | 44260098 |
| 195 | 92735    | 5280666  | 162464   | 442810   | 92138    |
| 196 | 107848   | 261859   | 168114   | 185605   | 16061280 |
| 197 | 114776   | 24197663 | 443322   | 5320351  | 442793   |
| 198 | 24832101 | 442101   | 5281855  | 163776   | 185617   |
| 199 | 5281377  | 7605278  | 91458    | 120693   | 609998   |
| 200 | 6857559  | 5480505  | 3084742  | 5281614  | 5318624  |
| 201 | 5280441  | 5315263  | 6758     | 442793   | 5281131  |
| 202 | 34458    | 4970     | 5320462  | 24752823 | 68081    |
| 203 | 442810   | 5489486  | 356660   | 88708    | 5480505  |

---

---

|     |          |          |          |         |          |
|-----|----------|----------|----------|---------|----------|
| 204 | 44135670 | 356660   | 16573    | 5318998 | 91458    |
| 205 | 5281775  | 392443   | 513197   | 5280450 | 5281125  |
| 206 | 5315263  | 5318869  | 37834    | 6419993 | 99091    |
| 207 | 98570    | 72301    | 3446460  | 5462438 | 44257399 |
| 208 | 114843   | 189065   | 5281775  | 92735   | 6438142  |
| 209 | 5280459  | 24832101 | 5281614  | 5281855 | 5281643  |
| 210 | 37834    | 5320844  | 86821    | 5839585 | 42608131 |
| 211 | 5281608  | 161036   | 5318998  | 7098673 | 156073   |
| 212 | 10143    | 12315119 | 177023   | 167718  | 5320462  |
| 213 | 5281675  | 98570    | 168115   | 1548943 | 177023   |
| 214 | 4970     | 5839585  | 6441404  | 91458   | 8193     |
| 215 | 6850754  | 5281131  | 5281754  | 6442675 | 392443   |
| 216 | 599030   | 73160    | 363452   | 5318869 | 167718   |
| 217 | 65064    | 609998   | 6167     | 86821   | 5320351  |
| 218 | 5281051  | 46173850 | 72301    | 10233   | 93045    |
| 219 | 3446460  | 23915    | 155256   | 576072  | 24197663 |
| 220 | 91520    | 6857559  | 5281753  | 72301   | 52940094 |
| 221 | 91458    | 5281417  | 668081   | 366269  | 5281603  |
| 222 | 93045    | 52940094 | 442514   | 155256  | 44135670 |
| 223 | 98369    | 445070   | 72277    | 161036  | 14986    |
| 224 | 161036   | 668081   | 16061280 | 168115  | 65084    |
| 225 | 16573    | 1548943  | 5646     | 6442181 | 126543   |
| 226 | 969516   | 443354   | 5318869  | 16573   | 442266   |
| 227 | 88708    | 124966   | 932      | 5281753 | 5281792  |
| 228 | 668081   | 73466    | 7098673  | 73114   | 5281654  |
| 229 | 8193     | 5281794  | 196699   | 6167    | 120693   |

---

---

|     |          |          |          |          |          |
|-----|----------|----------|----------|----------|----------|
| 230 | 168136   | 12309507 | 44257399 | 10143    | 92735    |
| 231 | 10154    | 6441404  | 609998   | 72625    | 5281406  |
| 232 | 10233    | 126543   | 439503   | 34458    | 3081405  |
| 233 | 392443   | 282014   | 92885    | 6850754  | 73160    |
| 234 | 101300   | 44257399 | 161871   | 5281852  | 107848   |
| 235 | 46173850 | 3085830  | 442662   | 124966   | 3084742  |
| 236 | 5281867  | 8193     | 282014   | 177023   | 5281608  |
| 237 | 442662   | 932      | 576072   | 1309     | 6441405  |
| 238 | 92138    | 442793   | 442266   | 969516   | 24832101 |
| 239 | 73466    | 5281654  | 44135670 | 24197663 | 6167     |
| 240 | 493570   | 5281752  | 46173966 | 46173967 | 163776   |
| 241 | 445070   | 5281855  | 9276     | 46173966 | 5281754  |
| 242 | 513197   | 442643   | 22179    | 5984     | 10233    |
| 243 | 5280699  | 34458    | 6442675  | 72616    | 12309507 |
| 244 | 117301   | 5320462  | 6419993  | 5646     | 442643   |
| 245 | 5280633  | 92138    | 24752823 | 9276     | 54676854 |
| 246 | 107905   | 5281608  | 1548943  | 5281794  | 11442    |
| 247 | 5320462  | 49770696 | 443421   | 3446460  | 5281675  |
| 248 | 9276     | 92265    | 5281131  | 5280933  | 114776   |
| 249 | 107938   | 72616    | 5281867  | 10154    | 5281855  |
| 250 | 6037     | 72277    | 98369    | 22179    | 441663   |
| 251 | 189065   | 5281603  | 98570    | 108053   | 3446460  |
| 252 | 5317419  | 6857681  | 442793   | 5281752  | 4970     |
| 253 | 5464461  | 5320351  | 10143    | 4970     | 24752823 |
| 254 | 124966   | 177023   | 98455    | 68051    | 88708    |
| 255 | 363452   | 108053   | 10233    | 443421   | 107938   |

---

---

|     |          |          |          |          |          |
|-----|----------|----------|----------|----------|----------|
| 256 | 5318624  | 519662   | 5281752  | 44257399 | 18772499 |
| 257 | 5322079  | 185605   | 46173965 | 196699   | 49770697 |
| 258 | 5281417  | 9276     | 643684   | 3082205  | 3082205  |
| 259 | 519662   | 162464   | 445639   | 6441404  | 643684   |
| 260 | 5281792  | 100058   | 5281852  | 6758     | 5646     |
| 261 | 16211077 | 93045    | 120693   | 363452   | 5318869  |
| 262 | 442101   | 599030   | 4970     | 439503   | 161036   |
| 263 | 22179    | 262500   | 6438142  | 98570    | 10154    |
| 264 | 92265    | 439503   | 101300   | 107938   | 6857681  |
| 265 | 229851   | 6438142  | 34458    | 442266   | 92885    |
| 266 | 5281406  | 65084    | 11442    | 445639   | 969516   |
| 267 | 5464155  | 117301   | 3081405  | 609998   | 185605   |
| 268 | 177023   | 88708    | 49770696 | 643684   | 7098673  |
| 269 | 7605278  | 3661     | 442643   | 5281125  | 7605278  |
| 270 | 576072   | 98455    | 107938   | 6438142  | 1309     |
| 271 | 5281603  | 442662   | 108053   | 101300   | 442647   |
| 272 | 5646     | 91458    | 445070   | 442643   | 13872451 |
| 273 | 98455    | 5464461  | 24197663 | 932      | 114843   |
| 274 | 49770697 | 10143    | 124966   | 92265    | 10143    |
| 275 | 5318869  | 197977   | 68081    | 114843   | 6442675  |
| 276 | 442266   | 73467    | 3661     | 92885    | 5280666  |
| 277 | 5280666  | 6167     | 6442181  | 11005    | 6037     |
| 278 | 6442675  | 101300   | 3082205  | 229851   | 282014   |
| 279 | 439503   | 11948668 | 5280933  | 668081   | 576072   |
| 280 | 440936   | 168136   | 5280450  | 11442    | 5281614  |
| 281 | 442514   | 6037     | 5281125  | 8193     | 5281752  |

---



---

|     |          |          |          |          |         |
|-----|----------|----------|----------|----------|---------|
| 282 | 5489486  | 107938   | 5281794  | 6760     | 168136  |
| 283 | 7098673  | 91520    | 6857681  | 6613     | 108053  |
| 284 | 131592   | 576072   | 6760     | 44135670 | 131594  |
| 285 | 131594   | 17473    | 10659    | 117301   | 3661    |
| 286 | 73160    | 442266   | 114843   | 445070   | 519662  |
| 287 | 24752823 | 3082205  | 126543   | 46173965 | 6857559 |
| 288 | 6760     | 440936   | 73114    | 5281131  | 5984    |
| 289 | 126543   | 120693   | 11005    | 92138    | 101300  |
| 290 | 68081    | 114843   | 131594   | 98455    | 16573   |
| 291 | 65084    | 119245   | 6613     | 6857681  | 161871  |
| 292 | 932      | 197563   | 229851   | 10659    | 439503  |
| 293 | 5281654  | 7098673  | 7605278  | 7605278  | 22179   |
| 294 | 72277    | 6760     | 519662   | 442647   | 124966  |
| 295 | 10302    | 131592   | 5984     | 131594   | 229851  |
| 296 | 6613     | 229851   | 92265    | 68081    | 34458   |
| 297 | 282014   | 161871   | 168136   | 3661     | 92265   |
| 298 | 12309507 | 24752823 | 117301   | 6857559  | 932     |
| 299 | 5281614  | 10659    | 6857559  | 126543   | 117301  |
| 300 | 120693   | 6613     | 24832101 | 519662   | 131592  |
| 301 | 161871   | 10302    | 131592   | 24832101 | 6760    |
| 302 | 10659    | 131594   | 8193     | 131592   | 10659   |
| 303 | 49770696 | 6850754  | 10302    | 168136   | 6613    |
| 304 | 5281855  | 5984     | 92138    | 10302    | 98455   |
| 305 | 5984     | 18772499 | 18772499 | 18772499 | 10302   |

---

**Table S3: Ranks for herbal ingredients predicted as candidate agonist for PXR by different methods.**

| rank | Docking  | QSAR_PCR | QSAR_PLS | SELF     |
|------|----------|----------|----------|----------|
| 1    | 45480624 | 18772499 | 18772499 | 3083427  |
| 2    | 16129778 | 6477652  | 6477652  | 10621    |
| 3    | 441877   | 24434    | 5281520  | 161940   |
| 4    | 5199     | 5281520  | 5373727  | 432116   |
| 5    | 161940   | 6433489  | 12409    | 6477652  |
| 6    | 197563   | 5373727  | 2116     | 262500   |
| 7    | 3083427  | 54605677 | 14986    | 200662   |
| 8    | 128229   | 5281852  | 54605677 | 197563   |
| 9    | 432524   | 2116     | 5281852  | 193876   |
| 10   | 441895   | 14986    | 24434    | 12314445 |
| 11   | 250395   | 12409    | 167551   | 6433489  |
| 12   | 122097   | 167551   | 68406    | 119245   |
| 13   | 197977   | 5281858  | 5281858  | 432524   |
| 14   | 24847857 | 68406    | 6433489  | 108062   |
| 15   | 198016   | 8222     | 89841    | 197561   |
| 16   | 432116   | 5281515  | 5281515  | 5315459  |
| 17   | 108062   | 5322111  | 5322111  | 44257279 |
| 18   | 196359   | 12401    | 8222     | 5281233  |
| 19   | 197561   | 89841    | 65078    | 6441498  |
| 20   | 3084742  | 11635    | 12401    | 5280746  |
| 21   | 44257279 | 65078    | 168115   | 6441188  |
| 22   | 65064    | 12398    | 11635    | 11953919 |
| 23   | 6441188  | 11006    | 12398    | 441381   |
| 24   | 125210   | 12391    | 3082205  | 5199     |

---

|    |          |          |          |          |
|----|----------|----------|----------|----------|
| 25 | 5281793  | 3082205  | 24832101 | 5271805  |
| 26 | 14982    | 5280489  | 636458   | 180948   |
| 27 | 262500   | 636458   | 11006    | 125210   |
| 28 | 5280805  | 168115   | 441298   | 24847857 |
| 29 | 11953919 | 24832101 | 12391    | 480768   |
| 30 | 168849   | 6506548  | 6506548  | 49775362 |
| 31 | 5281792  | 8141     | 52948006 | 275182   |
| 32 | 442664   | 52948006 | 54600668 | 5281613  |
| 33 | 107905   | 14350    | 14350    | 5281051  |
| 34 | 441381   | 5281235  | 5280489  | 174157   |
| 35 | 5281600  | 54600668 | 13584    | 17473    |
| 36 | 441764   | 24502    | 10104370 | 435402   |
| 37 | 5281613  | 441298   | 521253   | 441877   |
| 38 | 11953920 | 8193     | 168114   | 462196   |
| 39 | 174157   | 10104370 | 11442    | 155256   |
| 40 | 5281800  | 521253   | 526503   | 5281800  |
| 41 | 5281751  | 13584    | 8141     | 54605677 |
| 42 | 5281051  | 8175     | 5280795  | 5281852  |
| 43 | 5271805  | 526503   | 8193     | 381851   |
| 44 | 6475724  | 31289    | 6473881  | 22524411 |
| 45 | 5315459  | 8914     | 5281428  | 44259516 |
| 46 | 156073   | 454      | 44135670 | 5351212  |
| 47 | 6441498  | 168114   | 5281235  | 72301    |
| 48 | 119245   | 5280795  | 8175     | 442195   |
| 49 | 5320686  | 6473881  | 3033866  | 31553    |
| 50 | 441663   | 6184     | 8215     | 5318891  |

---

---

|    |          |          |          |          |
|----|----------|----------|----------|----------|
| 51 | 44257675 | 5281428  | 8181     | 197977   |
| 52 | 5281233  | 11442    | 31289    | 5280805  |
| 53 | 5280746  | 5280899  | 73114    | 54611038 |
| 54 | 193876   | 8181     | 8914     | 5281542  |
| 55 | 17473    | 5283349  | 454      | 6442181  |
| 56 | 16211077 | 6494     | 68051    | 46173967 |
| 57 | 5280804  | 44135670 | 12314445 | 11982640 |
| 58 | 3082301  | 8163     | 10467    | 5462438  |
| 59 | 462196   | 3033866  | 31284    | 442664   |
| 60 | 5282102  | 73114    | 558173   | 12305761 |
| 61 | 64982    | 305      | 222284   | 5280804  |
| 62 | 10621    | 31284    | 86821    | 5318880  |
| 63 | 5281643  | 8215     | 8163     | 107905   |
| 64 | 115149   | 13187    | 442643   | 5281807  |
| 65 | 5281673  | 12367    | 6184     | 23915    |
| 66 | 101712   | 5386591  | 9548595  | 5281751  |
| 67 | 441939   | 73145    | 5281     | 5281600  |
| 68 | 128327   | 92097    | 5280899  | 276547   |
| 69 | 5320844  | 246728   | 442793   | 5320844  |
| 70 | 134110   | 12314445 | 5281326  | 168849   |
| 71 | 44257224 | 10467    | 5280794  | 16211710 |
| 72 | 17679    | 558173   | 12303924 | 168114   |
| 73 | 5280441  | 10976    | 73145    | 6475724  |
| 74 | 11948668 | 6549     | 92097    | 10219    |
| 75 | 3085830  | 67179    | 6442181  | 5318893  |
| 76 | 245005   | 222284   | 177773   | 5281753  |

---

---

|     |          |          |         |          |
|-----|----------|----------|---------|----------|
| 77  | 10389806 | 86821    | 5386591 | 117440   |
| 78  | 5383409  | 101761   | 13187   | 44563198 |
| 79  | 5480505  | 3084282  | 24502   | 10455036 |
| 80  | 31553    | 5281     | 117301  | 5481237  |
| 81  | 44258916 | 9548595  | 445639  | 34059    |
| 82  | 72277    | 31253    | 5281125 | 1548943  |
| 83  | 5281777  | 92785    | 7605278 | 181796   |
| 84  | 42607998 | 5281326  | 5283349 | 115149   |
| 85  | 5351212  | 5280794  | 12367   | 64982    |
| 86  | 5281542  | 12303924 | 6494    | 441764   |
| 87  | 44259516 | 445639   | 985     | 73466    |
| 88  | 5281377  | 5281125  | 5281794 | 5280441  |
| 89  | 162464   | 6442181  | 246728  | 6419993  |
| 90  | 6453770  | 68051    | 101761  | 493570   |
| 91  | 5317419  | 3083613  | 3084282 | 168115   |
| 92  | 275182   | 985      | 442647  | 94475    |
| 93  | 5490064  | 7605278  | 92785   | 65064    |
| 94  | 16211710 | 442643   | 305     | 3082301  |
| 95  | 114776   | 5281794  | 5997    | 16211077 |
| 96  | 5317284  | 5280450  | 5280450 | 9954815  |
| 97  | 185617   | 11005    | 173183  | 503737   |
| 98  | 5318880  | 177773   | 10976   | 261859   |
| 99  | 44563159 | 196359   | 11005   | 44563159 |
| 100 | 5281614  | 442793   | 1549018 | 73467    |
| 101 | 92735    | 5280933  | 3083613 | 128327   |
| 102 | 5280459  | 5280934  | 6549    | 6453770  |

---

---

|     |          |          |         |          |
|-----|----------|----------|---------|----------|
| 103 | 49775362 | 117301   | 67179   | 5320686  |
| 104 | 1794427  | 7794     | 5282108 | 98369    |
| 105 | 42608131 | 5281517  | 11791   | 250395   |
| 106 | 5280699  | 187      | 5280933 | 5317419  |
| 107 | 5281807  | 5997     | 5280934 | 442101   |
| 108 | 180948   | 3893     | 31253   | 5281673  |
| 109 | 65084    | 3520     | 1548943 | 44258916 |
| 110 | 97214    | 73170    | 5281327 | 442435   |
| 111 | 94475    | 5281516  | 444679  | 196699   |
| 112 | 276547   | 173183   | 3893    | 5315263  |
| 113 | 3033957  | 1548943  | 6433147 | 358902   |
| 114 | 442195   | 7765     | 73170   | 443421   |
| 115 | 435402   | 637566   | 5281517 | 5281867  |
| 116 | 5281603  | 643820   | 7794    | 189065   |
| 117 | 5318891  | 1549018  | 521380  | 22524410 |
| 118 | 22524411 | 2969     | 92138   | 356660   |
| 119 | 5318893  | 638011   | 196359  | 3085830  |
| 120 | 189065   | 643779   | 92885   | 5281794  |
| 121 | 16142    | 5281327  | 5281752 | 72277    |
| 122 | 381851   | 444679   | 173843  | 366269   |
| 123 | 5281654  | 11953920 | 1104    | 49770696 |
| 124 | 5281775  | 5282108  | 5281516 | 25202038 |
| 125 | 5464155  | 442647   | 101616  | 65033    |
| 126 | 5281675  | 8158     | 2969    | 5383409  |
| 127 | 442662   | 68346    | 17100   | 5318998  |
| 128 | 161671   | 379      | 442501  | 12315119 |

---

---

|     |          |         |         |          |
|-----|----------|---------|---------|----------|
| 129 | 25202038 | 6433147 | 187     | 54600668 |
| 130 | 46173850 | 8294    | 637566  | 86821    |
| 131 | 10219    | 11791   | 643820  | 5281775  |
| 132 | 5320351  | 10983   | 7765    | 5281777  |
| 133 | 503737   | 173843  | 8158    | 440936   |
| 134 | 5280666  | 8892    | 62935   | 9276     |
| 135 | 358902   | 445070  | 3083909 | 65071    |
| 136 | 107971   | 1549778 | 5462438 | 44257224 |
| 137 | 5280633  | 8038    | 11142   | 164146   |
| 138 | 5481237  | 1104    | 61416   | 5282102  |
| 139 | 49770697 | 92885   | 638011  | 5464461  |
| 140 | 44563121 | 7991    | 643779  | 441298   |
| 141 | 12314445 | 92138   | 6441405 | 445070   |
| 142 | 9064     | 61416   | 8294    | 5281793  |
| 143 | 52940094 | 725     | 10123   | 5489486  |
| 144 | 5464461  | 62935   | 445070  | 3033957  |
| 145 | 179651   | 3083909 | 379     | 68051    |
| 146 | 100058   | 521380  | 1549778 | 5281417  |
| 147 | 639665   | 5318516 | 643684  | 11948668 |
| 148 | 5322079  | 17100   | 22311   | 668081   |
| 149 | 93045    | 442501  | 440917  | 5490064  |
| 150 | 5281608  | 5281752 | 7462    | 44563121 |
| 151 | 513197   | 5281131 | 68346   | 37834    |
| 152 | 117440   | 11142   | 3520    | 72616    |
| 153 | 91520    | 14768   | 5319022 | 442810   |
| 154 | 5319744  | 101616  | 6441404 | 91520    |

---

---

|     |          |          |          |          |
|-----|----------|----------|----------|----------|
| 155 | 599030   | 1118     | 435402   | 443322   |
| 156 | 72276    | 23083748 | 5318891  | 2116     |
| 157 | 22524410 | 643684   | 11953920 | 513197   |
| 158 | 9954815  | 10494    | 11230    | 5464155  |
| 159 | 3446460  | 5282110  | 8892     | 442662   |
| 160 | 443354   | 1123     | 3081930  | 11005    |
| 161 | 34059    | 5319022  | 23135    | 162350   |
| 162 | 46173969 | 7780     | 8038     | 9979767  |
| 163 | 9979767  | 10123    | 5318893  | 46173966 |
| 164 | 5481964  | 23135    | 6857681  | 443354   |
| 165 | 480768   | 5462438  | 10983    | 44257675 |
| 166 | 73160    | 22311    | 5318880  | 158940   |
| 167 | 5281789  | 440917   | 5282110  | 46173850 |
| 168 | 44563198 | 7462     | 5281867  | 98570    |
| 169 | 200662   | 6042     | 10494    | 5322079  |
| 170 | 173183   | 435402   | 44563198 | 5281377  |
| 171 | 65071    | 168928   | 44563121 | 107971   |
| 172 | 161388   | 122097   | 725      | 5280933  |
| 173 | 160237   | 6857681  | 12304682 | 161388   |
| 174 | 23915    | 276547   | 7991     | 445639   |
| 175 | 164146   | 10430    | 6042     | 5280699  |
| 176 | 442101   | 5281565  | 480768   | 442514   |
| 177 | 5280343  | 6441405  | 168928   | 100058   |
| 178 | 11982640 | 5281867  | 5318516  | 5280450  |
| 179 | 158940   | 73299    | 96946    | 5280459  |
| 180 | 161036   | 119      | 5281565  | 5280633  |

---



---

|     |          |          |          |          |
|-----|----------|----------|----------|----------|
| 181 | 6850754  | 6441404  | 24832090 | 46173965 |
| 182 | 72323    | 11230    | 11083898 | 363452   |
| 183 | 5280445  | 3081930  | 5281131  | 442217   |
| 184 | 31378    | 11083898 | 276547   | 6758     |
| 185 | 73299    | 5273621  | 72625    | 10389806 |
| 186 | 392443   | 96946    | 7780     | 6441404  |
| 187 | 5318624  | 5318893  | 6438142  | 73114    |
| 188 | 6037     | 24832090 | 15694585 | 72625    |
| 189 | 54611038 | 5318880  | 6857559  | 42607998 |
| 190 | 5280795  | 12304682 | 5273621  | 6850754  |
| 191 | 73466    | 200146   | 442217   | 162464   |
| 192 | 5318999  | 198016   | 65033    | 5839585  |
| 193 | 12303924 | 247      | 23083748 | 599030   |
| 194 | 442793   | 30247    | 108053   | 44260098 |
| 195 | 19009    | 15694585 | 9954815  | 92138    |
| 196 | 5997     | 442048   | 200146   | 16061280 |
| 197 | 99091    | 5316148  | 11982640 | 442793   |
| 198 | 54600668 | 5318891  | 13872451 | 185617   |
| 199 | 5379096  | 108062   | 442048   | 609998   |
| 200 | 162350   | 5018391  | 5316148  | 5318624  |
| 201 | 5481234  | 6857559  | 3428129  | 5281131  |
| 202 | 73467    | 44563121 | 1123     | 68081    |
| 203 | 5281691  | 480768   | 14768    | 5480505  |
| 204 | 167691   | 44563198 | 1118     | 91458    |
| 205 | 197469   | 637520   | 44563159 | 5281125  |
| 206 | 167718   | 442217   | 11463    | 99091    |

---

---

|     |          |          |          |          |
|-----|----------|----------|----------|----------|
| 207 | 188323   | 65033    | 10545    | 44257399 |
| 208 | 3081405  | 64945    | 73299    | 6438142  |
| 209 | 7098673  | 33510    | 5317652  | 5281643  |
| 210 | 12315119 | 637511   | 51394521 | 42608131 |
| 211 | 6419993  | 108053   | 519662   | 156073   |
| 212 | 5317652  | 9954815  | 6431456  | 5320462  |
| 213 | 44260098 | 6438142  | 122097   | 177023   |
| 214 | 441893   | 5317652  | 5018391  | 8193     |
| 215 | 638278   | 10545    | 6987     | 392443   |
| 216 | 46173967 | 3428129  | 7439     | 167718   |
| 217 | 167452   | 403773   | 10219    | 5320351  |
| 218 | 65033    | 10219    | 5280951  | 93045    |
| 219 | 261859   | 1550828  | 191055   | 24197663 |
| 220 | 5281406  | 72616    | 196699   | 52940094 |
| 221 | 88708    | 98570    | 353825   | 5281603  |
| 222 | 119041   | 51394521 | 403773   | 44135670 |
| 223 | 49770696 | 519662   | 1550828  | 14986    |
| 224 | 5281417  | 6431456  | 72616    | 65084    |
| 225 | 12305761 | 6987     | 98570    | 126543   |
| 226 | 5462438  | 7439     | 7438     | 442266   |
| 227 | 167551   | 5281575  | 30247    | 5281792  |
| 228 | 44558930 | 5280951  | 5318998  | 5281654  |
| 229 | 14427376 | 5318998  | 5353656  | 120693   |
| 230 | 356660   | 5353656  | 68094    | 92735    |
| 231 | 444679   | 68094    | 521710   | 5281406  |
| 232 | 17751009 | 167718   | 42608147 | 3081405  |

---

---

|     |          |          |          |          |
|-----|----------|----------|----------|----------|
| 233 | 52948006 | 11463    | 5281575  | 73160    |
| 234 | 99474    | 72625    | 10430    | 107848   |
| 235 | 442217   | 73401    | 167718   | 3084742  |
| 236 | 5489486  | 191055   | 10455036 | 5281608  |
| 237 | 145659   | 61361    | 64945    | 6441405  |
| 238 | 163776   | 91457    | 637511   | 24832101 |
| 239 | 161294   | 353825   | 3515     | 6167     |
| 240 | 5281803  | 11982640 | 6651     | 163776   |
| 241 | 5315263  | 13872451 | 10719    | 5281754  |
| 242 | 13872451 | 44563159 | 119      | 10233    |
| 243 | 119396   | 161388   | 91457    | 12309507 |
| 244 | 9548595  | 521710   | 637520   | 442643   |
| 245 | 91439    | 42608147 | 442195   | 54676854 |
| 246 | 5318869  | 10212    | 61361    | 11442    |
| 247 | 443639   | 68081    | 389885   | 5281675  |
| 248 | 222284   | 6651     | 2774722  | 114776   |
| 249 | 168115   |          | 8815     | 5281855  |
| 250 | 493570   |          |          | 441663   |
| 251 | 3428129  |          |          | 3446460  |
| 252 | 5280863  |          |          | 4970     |
| 253 | 12309507 |          |          | 24752823 |
| 254 | 131900   |          |          | 88708    |
| 255 | 10494    |          |          | 107938   |
| 256 | 442514   |          |          | 18772499 |
| 257 | 5839585  |          |          | 49770697 |
| 258 | 2116     |          |          | 3082205  |

---

---

|     |          |          |
|-----|----------|----------|
| 259 | 107848   | 643684   |
| 260 | 3220     | 5646     |
| 261 | 442810   | 5318869  |
| 262 | 439435   | 161036   |
| 263 | 5281612  | 10154    |
| 264 | 282014   | 6857681  |
| 265 | 46173968 | 92885    |
| 266 | 10455036 | 969516   |
| 267 | 441298   | 185605   |
| 268 | 363452   | 7098673  |
| 269 | 185605   | 7605278  |
| 270 | 181796   | 1309     |
| 271 | 440936   | 442647   |
| 272 | 34458    | 13872451 |
| 273 | 91458    | 114843   |
| 274 | 101761   | 10143    |
| 275 | 969516   | 6442675  |
| 276 | 5318998  | 5280666  |
| 277 | 114829   | 6037     |
| 278 | 5281753  | 282014   |
| 279 | 1548943  | 576072   |
| 280 | 14986    | 5281614  |
| 281 | 443322   | 5281752  |
| 282 | 168928   | 168136   |
| 283 | 3084282  | 108053   |
| 284 | 100780   | 131594   |

---

---

|     |          |         |
|-----|----------|---------|
| 285 | 6167     | 3661    |
| 286 | 6442675  | 519662  |
| 287 | 5281605  | 6857559 |
| 288 | 5280443  | 5984    |
| 289 | 5646     | 101300  |
| 290 | 5281326  | 16573   |
| 291 | 98570    | 161871  |
| 292 | 155256   | 439503  |
| 293 | 64945    | 22179   |
| 294 | 5281327  | 124966  |
| 295 | 5320462  | 229851  |
| 296 | 5281852  | 34458   |
| 297 | 442435   | 92265   |
| 298 | 6441405  | 932     |
| 299 | 72301    | 117301  |
| 300 | 5281125  | 131592  |
| 301 | 72310    | 6760    |
| 302 | 76573    | 10659   |
| 303 | 5281794  | 6613    |
| 304 | 5280961  | 98455   |
| 305 | 5280794  | 10302   |
| 306 | 5320946  |         |
| 307 | 72       |         |
| 308 | 2703     |         |
| 309 | 14608889 |         |
| 310 | 609998   |         |

---

---

|     |          |
|-----|----------|
| 311 | 439503   |
| 312 | 5281855  |
| 313 | 160254   |
| 314 | 101301   |
| 315 | 24752823 |
| 316 | 5281628  |
| 317 | 5281858  |
| 318 | 5319322  |
| 319 | 92097    |
| 320 | 643684   |
| 321 | 72704    |
| 322 | 356662   |
| 323 | 161871   |
| 324 | 5281708  |
| 325 | 985      |
| 326 | 5281617  |
| 327 | 68406    |
| 328 | 5280378  |
| 329 | 4501     |
| 330 | 576072   |
| 331 | 689043   |
| 332 | 5281707  |
| 333 | 442977   |
| 334 | 161487   |
| 335 | 10168    |
| 336 | 73145    |

---

---

|     |          |
|-----|----------|
| 337 | 5281752  |
| 338 | 5154     |
| 339 | 22179    |
| 340 | 5321317  |
| 341 | 160876   |
| 342 | 16061280 |
| 343 | 37834    |
| 344 | 73337    |
| 345 | 46173970 |
| 346 | 668081   |
| 347 | 72307    |
| 348 | 16573    |
| 349 | 445858   |
| 350 | 5280373  |
| 351 | 5280442  |
| 352 | 10154    |
| 353 | 12304682 |
| 354 | 442009   |
| 355 | 338      |
| 356 | 92785    |
| 357 | 1309     |
| 358 | 20055073 |
| 359 | 73170    |
| 360 | 8215     |
| 361 | 120693   |
| 362 | 98369    |

---

---

|     |          |
|-----|----------|
| 363 | 5280933  |
| 364 | 6438142  |
| 365 | 5281849  |
| 366 | 10233    |
| 367 | 46173966 |
| 368 | 72322    |
| 369 | 9276     |
| 370 | 11005    |
| 371 | 92885    |
| 372 | 6442181  |
| 373 | 72616    |
| 374 | 443421   |
| 375 | 443720   |
| 376 | 4970     |
| 377 | 4382     |
| 378 | 10207    |
| 379 | 72625    |
| 380 | 86821    |
| 381 | 1104     |
| 382 | 932      |
| 383 | 736186   |
| 384 | 5280450  |
| 385 | 445639   |
| 386 | 5281867  |
| 387 | 5280489  |
| 388 | 370      |

---



---

|     |          |
|-----|----------|
| 389 | 5281232  |
| 390 | 73114    |
| 391 | 443422   |
| 392 | 10467    |
| 393 | 5281     |
| 394 | 318797   |
| 395 | 681      |
| 396 | 10639    |
| 397 | 2353     |
| 398 | 525      |
| 399 | 366269   |
| 400 | 44257206 |
| 401 | 152867   |
| 402 | 54670067 |
| 403 | 160142   |
| 404 | 196699   |
| 405 | 403773   |
| 406 | 54676038 |
| 407 | 159888   |
| 408 | 46173971 |
| 409 | 44559448 |
| 410 | 6758     |
| 411 | 54678501 |
| 412 | 442048   |
| 413 | 194774   |
| 414 | 96946    |

---

---

|     |          |
|-----|----------|
| 415 | 12409    |
| 416 | 107938   |
| 417 | 442266   |
| 418 | 5316148  |
| 419 | 168114   |
| 420 | 5281416  |
| 421 | 6251     |
| 422 | 7605278  |
| 423 | 68051    |
| 424 | 89841    |
| 425 | 161271   |
| 426 | 3893     |
| 427 | 44257399 |
| 428 | 181105   |
| 429 | 6036     |
| 430 | 200146   |
| 431 | 177023   |
| 432 | 10227    |
| 433 | 717531   |
| 434 | 5281754  |
| 435 | 3082205  |
| 436 | 5280934  |
| 437 | 66308    |
| 438 | 8468     |
| 439 | 92265    |
| 440 | 124966   |

---

---

|     |         |
|-----|---------|
| 441 | 10143   |
| 442 | 5984    |
| 443 | 624381  |
| 444 | 68313   |
| 445 | 6441404 |
| 446 | 875     |
| 447 | 5281607 |
| 448 | 442643  |
| 449 | 8742    |
| 450 | 626608  |
| 451 | 101616  |
| 452 | 5280899 |
| 453 | 353825  |
| 454 | 10742   |
| 455 | 65078   |
| 456 | 5281832 |
| 457 | 5793    |
| 458 | 8768    |
| 459 | 5610    |
| 460 | 151010  |
| 461 | 360850  |
| 462 | 5202    |
| 463 | 73401   |
| 464 | 6450278 |
| 465 | 1130    |
| 466 | 3884    |

---

---

|     |          |
|-----|----------|
| 467 | 5281575  |
| 468 | 135      |
| 469 | 13584    |
| 470 | 516811   |
| 471 | 114843   |
| 472 | 2969     |
| 473 | 11442    |
| 474 | 643757   |
| 475 | 10208    |
| 476 | 637542   |
| 477 | 3314     |
| 478 | 26948    |
| 479 | 10983    |
| 480 | 389885   |
| 481 | 8357     |
| 482 | 10922465 |
| 483 | 33510    |
| 484 | 95259    |
| 485 | 171548   |
| 486 | 699414   |
| 487 | 101300   |
| 488 | 108053   |
| 489 | 3806     |
| 490 | 117301   |
| 491 | 229851   |
| 492 | 185071   |

---

---

|     |          |
|-----|----------|
| 493 | 444972   |
| 494 | 6613     |
| 495 | 445070   |
| 496 | 119039   |
| 497 | 3083909  |
| 498 | 442943   |
| 499 | 6439929  |
| 500 | 94253    |
| 501 | 442424   |
| 502 | 526503   |
| 503 | 359      |
| 504 | 7478     |
| 505 | 638024   |
| 506 | 98455    |
| 507 | 11635    |
| 508 | 127567   |
| 509 | 439353   |
| 510 | 379      |
| 511 | 28397    |
| 512 | 46173965 |
| 513 | 5281428  |
| 514 | 23135    |
| 515 | 892      |
| 516 | 5429     |
| 517 | 68079    |
| 518 | 5281426  |

---

---

|     |         |
|-----|---------|
| 519 | 3661    |
| 520 | 6267    |
| 521 | 7431    |
| 522 | 441437  |
| 523 | 164642  |
| 524 | 164676  |
| 525 | 938     |
| 526 | 160600  |
| 527 | 8193    |
| 528 | 6027    |
| 529 | 5281131 |
| 530 | 243     |
| 531 | 114917  |
| 532 | 785     |
| 533 | 8222    |
| 534 | 725     |
| 535 | 105118  |
| 536 | 442647  |
| 537 | 12401   |
| 538 | 61416   |
| 539 | 6431456 |
| 540 | 10659   |
| 541 | 131592  |
| 542 | 1118    |
| 543 | 5353656 |
| 544 | 91466   |

---

---

|     |          |
|-----|----------|
| 545 | 171455   |
| 546 | 114850   |
| 547 | 66548    |
| 548 | 289      |
| 549 | 444539   |
| 550 | 10212    |
| 551 | 1123     |
| 552 | 623940   |
| 553 | 101716   |
| 554 | 5281565  |
| 555 | 131594   |
| 556 | 8181     |
| 557 | 107936   |
| 558 | 5280460  |
| 559 | 68081    |
| 560 | 7420     |
| 561 | 51394521 |
| 562 | 119      |
| 563 | 10364    |
| 564 | 68094    |
| 565 | 6760     |
| 566 | 9548630  |
| 567 | 91457    |
| 568 | 7991     |
| 569 | 15694585 |
| 570 | 126543   |

---

---

|     |         |
|-----|---------|
| 571 | 6137    |
| 572 | 4276    |
| 573 | 167683  |
| 574 | 522266  |
| 575 | 6857559 |
| 576 | 95924   |
| 577 | 8158    |
| 578 | 558173  |
| 579 | 12391   |
| 580 | 115269  |
| 581 | 618688  |
| 582 | 2879    |
| 583 | 92138   |
| 584 | 8914    |
| 585 | 204     |
| 586 | 5281235 |
| 587 | 641668  |
| 588 | 8892    |
| 589 | 5273621 |
| 590 | 442146  |
| 591 | 1110    |
| 592 | 4114    |
| 593 | 91354   |
| 594 | 5032    |
| 595 | 4133    |
| 596 | 5570    |

---



---

|     |          |
|-----|----------|
| 597 | 291264   |
| 598 | 6857681  |
| 599 | 2075     |
| 600 | 127742   |
| 601 | 5281516  |
| 602 | 10332    |
| 603 | 442625   |
| 604 | 2774722  |
| 605 | 92812    |
| 606 | 5318516  |
| 607 | 23205    |
| 608 | 10748    |
| 609 | 68827    |
| 610 | 7780     |
| 611 | 1550828  |
| 612 | 6199     |
| 613 | 165549   |
| 614 | 452191   |
| 615 | 11006    |
| 616 | 10104370 |
| 617 | 637566   |
| 618 | 10302    |
| 619 | 11791    |
| 620 | 10719    |
| 621 | 643820   |
| 622 | 73285    |

---

---

|     |         |
|-----|---------|
| 623 | 5316743 |
| 624 | 3033866 |
| 625 | 72610   |
| 626 | 65188   |
| 627 | 6433147 |
| 628 | 8163    |
| 629 | 31284   |
| 630 | 519662  |
| 631 | 12367   |
| 632 | 571784  |
| 633 | 5317485 |
| 634 | 6989    |
| 635 | 12398   |
| 636 | 6998    |
| 637 | 362908  |
| 638 | 17100   |
| 639 | 442501  |
| 640 | 5386591 |
| 641 | 165536  |
| 642 | 168136  |
| 643 | 12072   |
| 644 | 94174   |
| 645 | 441457  |
| 646 | 5271984 |
| 647 | 6651    |
| 648 | 3515    |

---

---

|     |         |
|-----|---------|
| 649 | 325140  |
| 650 | 5281520 |
| 651 | 3520    |
| 652 | 7361    |
| 653 | 173843  |
| 654 | 6430834 |
| 655 | 11230   |
| 656 | 3885    |
| 657 | 2240    |
| 658 | 5282110 |
| 659 | 5280951 |
| 660 | 247     |
| 661 | 6506548 |
| 662 | 61361   |
| 663 | 442536  |
| 664 | 644020  |
| 665 | 5281517 |
| 666 | 7438    |
| 667 | 14350   |
| 668 | 10658   |
| 669 | 5281515 |
| 670 | 2519    |
| 671 | 554     |
| 672 | 7028    |
| 673 | 521380  |
| 674 | 996     |

---

---

|     |          |
|-----|----------|
| 675 | 6549     |
| 676 | 442938   |
| 677 | 10205    |
| 678 | 169014   |
| 679 | 5283349  |
| 680 | 24832090 |
| 681 | 10430    |
| 682 | 5486616  |
| 683 | 14768    |
| 684 | 6473881  |
| 685 | 244      |
| 686 | 521253   |
| 687 | 120671   |
| 688 | 5280953  |
| 689 | 67179    |
| 690 | 3081930  |
| 691 | 10235    |
| 692 | 774      |
| 693 | 91471    |
| 694 | 7127     |
| 695 | 10976    |
| 696 | 19725    |
| 697 | 5322111  |
| 698 | 177773   |
| 699 | 2355     |
| 700 | 42608147 |

---

---

|     |          |
|-----|----------|
| 701 | 1549778  |
| 702 | 72724    |
| 703 | 27867    |
| 704 | 460      |
| 705 | 101680   |
| 706 | 175002   |
| 707 | 8294     |
| 708 | 443009   |
| 709 | 305      |
| 710 | 5018391  |
| 711 | 19243    |
| 712 | 10955174 |
| 713 | 187      |
| 714 | 107937   |
| 715 | 5282108  |
| 716 | 8175     |
| 717 | 524251   |
| 718 | 234566   |
| 719 | 102667   |
| 720 | 10123    |
| 721 | 191055   |
| 722 | 454      |
| 723 | 64685    |
| 724 | 5319022  |
| 725 | 638011   |
| 726 | 5373727  |

---

---

|     |         |
|-----|---------|
| 727 | 30247   |
| 728 | 61126   |
| 729 | 19244   |
| 730 | 92759   |
| 731 | 13187   |
| 732 | 6494    |
| 733 | 6432469 |
| 734 | 6430313 |
| 735 | 5281404 |
| 736 | 636458  |
| 737 | 660     |
| 738 | 31289   |
| 739 | 8815    |
| 740 | 3083613 |
| 741 | 637520  |
| 742 | 6448    |
| 743 | 7794    |
| 744 | 326     |
| 745 | 1254    |
| 746 | 31244   |
| 747 | 7765    |
| 748 | 6988    |
| 749 | 643779  |
| 750 | 6553876 |
| 751 | 7410    |
| 752 | 261491  |

---

---

|     |          |
|-----|----------|
| 753 | 10545    |
| 754 | 323      |
| 755 | 12160    |
| 756 | 11083898 |
| 757 | 637563   |
| 758 | 68346    |
| 759 | 6987     |
| 760 | 7462     |
| 761 | 329983   |
| 762 | 91195    |
| 763 | 12304613 |
| 764 | 7463     |
| 765 | 637511   |
| 766 | 240      |
| 767 | 1549018  |
| 768 | 8141     |
| 769 | 11463    |
| 770 | 521710   |
| 771 | 24473    |
| 772 | 8082     |
| 773 | 68231    |
| 774 | 7439     |
| 775 | 6427105  |
| 776 | 31253    |
| 777 | 26049    |
| 778 | 159055   |

---

---

|     |          |
|-----|----------|
| 779 | 89594    |
| 780 | 8038     |
| 781 | 2537     |
| 782 | 246728   |
| 783 | 34645    |
| 784 | 9231     |
| 785 | 7929     |
| 786 | 7362     |
| 787 | 440917   |
| 788 | 22311    |
| 789 | 18818    |
| 790 | 66948    |
| 791 | 6654     |
| 792 | 2758     |
| 793 | 11142    |
| 794 | 1201521  |
| 795 | 6184     |
| 796 | 7500     |
| 797 | 14525    |
| 798 | 7809     |
| 799 | 6616     |
| 800 | 14896    |
| 801 | 7302     |
| 802 | 16133932 |

---
